# Supplementary material for: Referrals and Determinant Factors of a National School Health Campaign in Lebanon on Children Aged between 3 and 12 Years Old
Source: MDPI journal article supplement (doi:10.3390/children11020175), 2024-01-30
Supplement: s1 [file s1]

# Referrals & Determinant Factors of a National School Health Campaign in Lebanon on Children Aged between 3 & 12 years-old

Peter HABCHY et al.

Supplementary materials:

**Table S1A. Associations between referrals & sociodemographic data and other factors**

| Referrals                    |               | Any referral<br>N (%) |             | Referral for abnormal<br>growth<br>N (%) |           | Referral for abnormal<br>vision<br>N (%) |            | Referral for mental<br>health problem<br>N (%) |           | Referral for abnormal<br>oral exam<br>N (%) |             | Referral for uncom-<br>plete Vaccination<br>N (%) |             |
|------------------------------|---------------|-----------------------|-------------|------------------------------------------|-----------|------------------------------------------|------------|------------------------------------------------|-----------|---------------------------------------------|-------------|---------------------------------------------------|-------------|
|                              |               | No                    | Yes         | No                                       | Yes       | No                                       | Yes        | No                                             | Yes       | No                                          | Yes         | No                                                | Yes         |
| <b>Sociodemographic data</b> |               |                       |             |                                          |           |                                          |            |                                                |           |                                             |             |                                                   |             |
| Nationality                  | Lebanese      | 3357 (50.2)           | 3325 (49.8) | 6303 (94.3)                              | 379 (5.7) | 5762 (86.2)                              | 920 (13.8) | 6569 (98.3)                                    | 113 (1.7) | 5482 (82.0)                                 | 1200 (18.0) | 4522 (74.3)                                       | 1561 (25.7) |
|                              | Syrian        | 309 (64.4)            | 171 (35.6)  | 437 (91.0)                               | 43 (9.0)  | 449 (93.5)                               | 31 (6.5)   | 474 (98.8)                                     | 6 (1.3)   | 425 (88.5)                                  | 55 (11.5)   | 373 (78.5)                                        | 102 (21.5)  |
|                              | Palestinian   | 6 (75.0)              | 2 (25)      | 8 (100.0)                                | 0 (0.0)   | 7 (87.5)                                 | 1 (12.5)   | 8 (100.0)                                      | 0 (0.0)   | 8 (100.0)                                   | 0 (0.0)     | 6 (75.0)                                          | 2 (25.0)    |
|                              | Other         | 4 (28.6)              | 10 (71.4)   | 12 (85.7)                                | 2 (14.3)  | 11 (78.6)                                | 3 (21.4)   | 13 (92.9)                                      | 1 (7.1)   | 10 (71.4)                                   | 4 (28.6)    | 8 (61.5)                                          | 5 (38.5)    |
|                              |               | p*                    |             | p*                                       |           | p*                                       |            | NS                                             |           | p*                                          |             | NS                                                |             |
| Gender                       | Male          | 1830 (52.4)           | 1661 (47.6) | 3289 (94.2)                              | 202 (5.8) | 3059 (87.6)                              | 432 (12.4) | 3429 (98.2)                                    | 62 (1.8)  | 2890 (82.8)                                 | 601 (17.2)  | 2390 (74.7)                                       | 809 (25.3)  |
|                              | Female        | 1846 (50.0)           | 1847 (50.0) | 3471 (94.0)                              | 222 (6.0) | 3170 (85.8)                              | 523 (14.2) | 3635 (98.4)                                    | 58 (1.6)  | 3035 (82.2)                                 | 658 (17.8)  | 2519 (74.5)                                       | 861 (25.5)  |
|                              |               | p*                    |             | NS                                       |           | p*                                       |            | NS                                             |           | NS                                          |             | NS                                                |             |
| Age                          | 3-6 years     | 1589 (59.8)           | 1068 (40.2) | 2561 (96.4)                              | 96 (3.6)  | 2515 (94.7)                              | 142 (5.3)  | 2622 (98.7)                                    | 35 (1.3)  | 2282 (85.9)                                 | 375 (14.1)  | 1899 (79.8)                                       | 482 (20.2)  |
|                              | 7-9 years     | 1104 (47.9)           | 1201 (52.1) | 2136 (92.7)                              | 169 (7.3) | 1924 (83.5)                              | 381 (16.5) | 2271 (98.5)                                    | 34 (1.5)  | 1851 (80.3)                                 | 454 (19.7)  | 1624 (74.1)                                       | 569 (25.9)  |
|                              | 10-12 years   | 983 (44.2)            | 1239 (55.8) | 2063 (92.8)                              | 159 (7.2) | 1790 (80.6)                              | 432 (19.4) | 2171 (97.7)                                    | 51 (2.3)  | 1792 (80.6)                                 | 430 (19.4)  | 1386 (69.1)                                       | 619 (30.9)  |
|                              |               | p*                    |             | p*                                       |           | p*                                       |            | p*                                             |           | p*                                          |             | p*                                                |             |
| BMI                          | Underweight   | 1064 (55.2)           | 862 (44.8)  | 1794 (93.1)                              | 132 (6.9) | 1687 (87.6)                              | 239 (12.4) | 1892 (98.2)                                    | 34 (1.8)  | 1604 (83.3)                                 | 322 (16.7)  | 1369 (77.7)                                       | 392 (22.3)  |
|                              | Normal weight | 1522 (52.9)           | 1354 (47.1) | 2745 (95.4)                              | 131 (4.6) | 2552 (88.7)                              | 324 (11.3) | 2838 (98.7)                                    | 38 (1.3)  | 2387 (83.0)                                 | 489 (17.0)  | 1960 (74.6)                                       | 669 (25.4)  |
|                              | Overweight    | 1090 (45.8)           | 1292 (54.2) | 2221 (93.2)                              | 161 (6.8) | 1990 (83.5)                              | 392 (16.5) | 2334 (98.0)                                    | 48 (2.0)  | 1934 (81.2)                                 | 44 (18.8)   | 1580 (72.2)                                       | 609 (27.8)  |
|                              |               | p*                    |             | p*                                       |           | p*                                       |            | NS                                             |           | NS                                          |             | p*                                                |             |
| Governorate                  | Beirut        | 93 (31.6)             | 201 (68.4)  | 269 (91.5)                               | 25 (8.5)  | 245 (83.3)                               | 49 (16.7)  | 293 (99.7)                                     | 1 (0.3)   | 222 (75.5)                                  | 72 (24.5)   | 187 (64.0)                                        | 105 (36.0)  |
|                              | Mount Lebanon | 653 (48.6)            | 692 (51.4)  | 153 (90.0)                               | 17 (10.0) | 152 (89.4)                               | 18 (10.6)  | 148 (87.1)                                     | 22 (12.9) | 127 (74.7)                                  | 43 (25.3)   | 101 (61.2)                                        | 64 (38.8)   |
|                              | North/Akkar   | 673 (55.9)            | 532 (44.1)  | 1125 (93.4)                              | 80 (6.6)  | 1103 (91.5)                              | 102 (8.5)  | 1196 (99.3)                                    | 9 (0.7)   | 1093 (90.7)                                 | 112 (9.3)   | 760 (71.4)                                        | 305 (28.6)  |
|                              | Beqaa/Baalbek | 1855 (54.8)           | 1527 (45.2) | 3201 (94.6)                              | 181 (5.4) | 2869 (84.8)                              | 513 (15.2) | 3334 (98.6)                                    | 48 (1.4)  | 2710 (80.1)                                 | 672 (19.9)  | 2405 (81.5)                                       | 547 (18.5)  |
|                              | South         | 976 (45.8)            | 1157 (54.2) | 2012 (94.3)                              | 121 (5.7) | 1860 (87.2)                              | 273 (12.8) | 2093 (98.1)                                    | 40 (1.9)  | 1773 (83.1)                                 | 360 (16.9)  | 1456 (69.2)                                       | 649 (30.8)  |
|                              |               | p*                    |             | p*                                       |           | p*                                       |            | p*                                             |           | p*                                          |             | p*                                                |             |
| School type                  | Public        | 1194 (48.7)           | 1257 (51.3) | 2264 (92.4)                              | 187 (7.6) | 2181 (89.0)                              | 270 (11.0) | 2407 (98.2)                                    | 44 (1.8)  | 2029 (82.8)                                 | 422 (17.2)  | 1543 (63.9)                                       | 873 (36.1)  |
|                              | Private       | 2482 (52.4)           | 2251 (47.6) | 4496 (95.0)                              | 237 (5.0) | 4048 (85.5)                              | 685 (14.5) | 4657 (98.4)                                    | 76 (1.6)  | 3896 (82.3)                                 | 837 (17.7)  | 3366 (80.9)                                       | 797 (19.1)  |
|                              |               | p*                    |             | p*                                       |           | p*                                       |            | NS                                             |           | NS                                          |             | p*                                                |             |
| Family income                | No income     | 138 (49.8)            | 139 (50.2)  | 261 (94.2)                               | 16 (5.8)  | 235 (84.8)                               | 42 (15.2)  | 275 (99.3)                                     | 2 (0.7)   | 231 (83.4)                                  | 46 (16.6)   | 184 (70.5)                                        | 77 (29.5)   |
|                              | <100\$        | 567 (46.1)            | 664 (53.9)  | 1128 (91.6)                              | 103 (8.4) | 1071 (87.0)                              | 160 (13.0) | 1212 (98.5)                                    | 19 (1.5)  | 958 (77.8)                                  | 273 (22.2)  | 754 (67.6)                                        | 361 (32.4)  |
|                              | 100-300\$     | 165 (49.7)            | 167 (50.3)  | 312 (94.0)                               | 20 (6.0)  | 288 (86.7)                               | 44 (13.3)  | 325 (97.9)                                     | 7 (2.1)   | 263 (79.2)                                  | 69 (20.8)   | 215 (72.1)                                        | 83 (27.9)   |
|                              | 300-600\$     | 422 (46.8)            | 480 (53.2)  | 859 (95.2)                               | 43 (4.8)  | 741 (82.2)                               | 161 (17.8) | 889 (98.6)                                     | 13 (1.4)  | 730 (80.9)                                  | 172 (19.1)  | 613 (73.1)                                        | 226 (26.9)  |
|                              | 600-900\$     | 100 (44.1)            | 127 (55.9)  | 223 (98.2)                               | 4 (1.8)   | 181 (79.7)                               | 46 (20.3)  | 221 (97.4)                                     | 6 (2.6)   | 193 (85.0)                                  | 34 (15.0)   | 162 (80.6)                                        | 39 (19.4)   |
|                              | >900\$        | 12 (44.4)             | 15 (55.6)   | 26 (96.3)                                | 1 (3.7)   | 22 (81.5)                                | 5 (18.5)   | 27 (100.0)                                     | 0 (0.0)   | 25 (92.6)                                   | 2 (7.4)     | 19 (73.1)                                         | 7 (26.9)    |
|                              |               | NS                    |             | p*                                       |           | p*                                       |            | NS                                             |           | p*                                          |             | p*                                                |             |
| Mother's occupa-<br>tion     | No work       | 3 (100.0)             | 0 (0.0)     | 3 (100.0)                                | 0 (0.0)   | 3 (100.0)                                | 0 (0.0)    | 3 (100.0)                                      | 0 (0.0)   | 3 (100.0)                                   | 0 (0.0)     | 2 (100.0)                                         | 0 (0.0)     |
|                              | Housewife     | 1114 (49.5)           | 1137 (50.5) | 2103 (93.4)                              | 148 (6.6) | 1935 (86.0)                              | 316 (14.0) | 2216 (98.4)                                    | 35 (1.6)  | 1819 (80.8)                                 | 432 (19.2)  | 1487 (71.8)                                       | 583 (28.2)  |
|                              | Student       | 12 (75.0)             | 4 (25.0)    | 16 (100.0)                               | 0 (0.0)   | 13 (81.3)                                | 3 (18.8)   | 16 (100.0)                                     | 0 (0.0)   | 15 (93.8)                                   | 1 (6.3)     | 10 (76.9)                                         | 3 (23.1)    |
|                              | Employed      | 292 (49.6)            | 297 (50.4)  | 567 (96.3)                               | 22 (3.7)  | 491 (83.4)                               | 98 (16.6)  | 574 (97.5)                                     | 15 (2.5)  | 494 (83.9)                                  | 95 (16.1)   | 437 (81.8)                                        | 97 (18.2)   |
|                              | Self-employed | 68 (50.7)             | 66 (49.3)   | 125 (93.3)                               | 9 (6.7)   | 117 (87.3)                               | 17 (12.7)  | 133 (99.3)                                     | 1 (0.7)   | 111 (82.8)                                  | 23 (17.2)   | 85 (69.7)                                         | 37 (30.3)   |
|                              | Unemployed    | 44 (50.0)             | 44 (50.0)   | 86 (97.7)                                | 2 (2.3)   | 77 (87.5)                                | 11 (12.5)  | 87 (98.9)                                      | 1 (1.1)   | 77 (87.5)                                   | 11 (12.5)   | 58 (69.0)                                         | 26 (31.0)   |
|                              | Retired       | 9 (100.0)             | 0 (0.0)     | 9 (100.0)                                | 0 (0.0)   | 9 (100.0)                                | 0 (0.0)    | 9 (100.0)                                      | 0 (0.0)   | 9 (100.0)                                   | 0 (0.0)     | 9 (100.0)                                         | 0 (0.0)     |
|                              | Disabled      | 1 (50.0)              | 1 (50.0)    | 2 (100.0)                                | 0 (0.0)   | 1 (50.0)                                 | 1 (50.0)   | 2 (100.0)                                      | 0 (0.0)   | 2 (100.0)                                   | 0 (0.0)     | 2 (100.0)                                         | 0 (0.0)     |
|                              | Health field  | 47 (61.8)             | 29 (38.2)   | 75 (98.7)                                | 1 (1.3)   | 70 (92.1)                                | 6 (7.9)    | 76 (100.0)                                     | 0 (0.0)   | 69 (90.8)                                   | 7 (9.2)     | 56 (81.2)                                         | 13 (18.8)   |
|                              | Other         | 14 (42.4)             | 19 (57.6)   | 33 (100.0)                               | 0 (0.0)   | 29 (87.9)                                | 4 (12.1)   | 31 (93.9)                                      | 2 (6.1)   | 26 (78.8)                                   | 7 (21.2)    | 21 (72.4)                                         | 8 (27.6)    |
|                              |               | p*                    |             | NS                                       |           | NS                                       |            | NS                                             |           | NS                                          |             | p*                                                |             |
| Father's occupa-<br>tion     | No work       | 7 (87.5)              | 1 (12.5)    | 8 (100.0)                                | 0 (0.0)   | 8 (100.0)                                | 0 (0.0)    | 8 (100.0)                                      | 0 (0.0)   | 8 (100.0)                                   | 0 (0.0)     | 7 (87.5)                                          | 1 (12.5)    |
|                              | Housewife     | 3 (60.0)              | 2 (40.0)    | 5 (100.0)                                | 0 (0.0)   | 5 (100.0)                                | 0 (0.0)    | 5 (100.0)                                      | 0 (0.0)   | 4 (80.0)                                    | 1 (20.0)    | 3 (60.0)                                          | 2 (40.0)    |
|                              | Student       | 9 (81.8)              | 2 (18.2)    | 11 (100.0)                               | 0 (0.0)   | 11 (100.0)                               | 0 (0.0)    | 11 (100.0)                                     | 0 (0.0)   | 11 (100.0)                                  | 0 (0.0)     | 8 (80.0)                                          | 2 (20.0)    |
|                              | Employed      | 693 (51.5)            | 652 (48.5)  | 1277 (94.9)                              | 68 (5.1)  | 1157 (86.0)                              | 188 (14.0) | 1321 (98.2)                                    | 24 (1.8)  | 1102 (81.9)                                 | 243 (18.1)  | 940 (78.0)                                        | 265 (22.0)  |

|                                                  |                                                                             |                                                                               |                                                                             |                                                                                 |                                                                   |                                                                               |                                                                         |                                                                                   |                                                                 |                                                                               |                                                                          |                                                                               |                                                                           |
|--------------------------------------------------|-----------------------------------------------------------------------------|-------------------------------------------------------------------------------|-----------------------------------------------------------------------------|---------------------------------------------------------------------------------|-------------------------------------------------------------------|-------------------------------------------------------------------------------|-------------------------------------------------------------------------|-----------------------------------------------------------------------------------|-----------------------------------------------------------------|-------------------------------------------------------------------------------|--------------------------------------------------------------------------|-------------------------------------------------------------------------------|---------------------------------------------------------------------------|
|                                                  | Self-employed<br>Unemployed<br>Retired<br>Disabled<br>Health field<br>Other | 507 (45.7)<br>117 (54.9)<br>58 (49.2)<br>11 (64.7)<br>23 (65.7)<br>122 (52.1) | 603 (54.3)<br>96 (45.1)<br>60 (50.8)<br>6 (35.3)<br>12 (34.3)<br>112 (47.9) | 1036 (93.3)<br>203 (95.3)<br>111 (94.1)<br>16 (94.1)<br>33 (94.3)<br>219 (93.6) | 74 (6.7)<br>10 (4.7)<br>7 (5.9)<br>1 (5.9)<br>2 (5.7)<br>15 (6.4) | 946 (85.2)<br>183 (85.9)<br>97 (82.2)<br>16 (94.1)<br>32 (91.4)<br>202 (86.3) | 164 (14.8)<br>30 (14.1)<br>21 (17.8)<br>1 (5.9)<br>3 (8.6)<br>32 (13.7) | 1091 (98.3)<br>211 (99.1)<br>115 (97.5)<br>17 (100.0)<br>35 (100.0)<br>231 (98.7) | 19 (1.7)<br>2 (0.9)<br>3 (2.5)<br>0 (0.0)<br>0 (0.0)<br>3 (1.3) | 910 (82.0)<br>185 (86.9)<br>90 (76.3)<br>14 (82.4)<br>32 (91.4)<br>179 (76.5) | 200 (18.0)<br>28 (13.1)<br>28 (23.7)<br>3 (17.6)<br>3 (8.6)<br>55 (23.5) | 708 (67.9)<br>145 (72.1)<br>79 (79.0)<br>13 (76.5)<br>30 (88.2)<br>157 (71.4) | 335 (32.1)<br>56 (27.9)<br>21 (21.0)<br>4 (23.5)<br>4 (11.8)<br>63 (28.6) |
|                                                  |                                                                             | p*                                                                            |                                                                             | NS                                                                              |                                                                   | NS                                                                            |                                                                         | NS                                                                                |                                                                 | p*                                                                            |                                                                          | p*                                                                            |                                                                           |
| Mother's<br>level of educa-<br>tion              | No education                                                                | 30 (41.1)                                                                     | 43 (58.9)                                                                   | 67 (91.8)                                                                       | 6 (8.2)                                                           | 61 (83.6)                                                                     | 12 (16.4)                                                               | 73 (100.0)                                                                        | 0 (0.0)                                                         | 53 (72.6)                                                                     | 20 (27.4)                                                                | 42 (60.9)                                                                     | 27 (39.1)                                                                 |
|                                                  | Primary                                                                     | 184 (46.1)                                                                    | 215 (53.9)                                                                  | 362 (90.7)                                                                      | 37 (9.3)                                                          | 351 (88.0)                                                                    | 48 (12.0)                                                               | 392 (98.2)                                                                        | 7 (1.8)                                                         | 312 (78.2)                                                                    | 87 (21.8)                                                                | 249 (64.8)                                                                    | 135 (35.2)                                                                |
|                                                  | Complementary                                                               | 346 (47.9)                                                                    | 376 (52.1)                                                                  | 674 (93.4)                                                                      | 48 (6.6)                                                          | 626 (86.7)                                                                    | 96 (13.3)                                                               | 707 (97.9)                                                                        | 15 (2.1)                                                        | 588 (81.4)                                                                    | 134 (18.6)                                                               | 456 (69.2)                                                                    | 203 (30.8)                                                                |
|                                                  | Secondary                                                                   | 336 (47.7)                                                                    | 369 (52.3)                                                                  | 661 (93.8)                                                                      | 44 (6.2)                                                          | 574 (81.4)                                                                    | 131 (18.6)                                                              | 691 (98.0)                                                                        | 14 (2.0)                                                        | 565 (80.1)                                                                    | 140 (19.9)                                                               | 472 (73.4)                                                                    | 171 (26.6)                                                                |
|                                                  | Undergraduate                                                               | 235 (53.9)                                                                    | 201 (46.1)                                                                  | 421 (96.6)                                                                      | 15 (3.4)                                                          | 376 (86.2)                                                                    | 60 (13.8)                                                               | 432 (99.1)                                                                        | 4 (0.9)                                                         | 362 (83.0)                                                                    | 74 (17.0)                                                                | 321 (81.5)                                                                    | 73 (18.5)                                                                 |
|                                                  | University graduate                                                         | 497 (54.8)                                                                    | 410 (45.2)                                                                  | 873 (96.3)                                                                      | 34 (3.7)                                                          | 793 (87.4)                                                                    | 114 (12.6)                                                              | 893 (98.5)                                                                        | 14 (1.5)                                                        | 773 (85.2)                                                                    | 134 (14.8)                                                               | 654 (79.2)                                                                    | 172 (20.8)                                                                |
|                                                  |                                                                             | p*                                                                            |                                                                             | p*                                                                              |                                                                   | p*                                                                            |                                                                         | NS                                                                                |                                                                 | p*                                                                            |                                                                          | p*                                                                            |                                                                           |
| Father's<br>level of educa-<br>tion              | No education                                                                | 77 (58.3)                                                                     | 55 (41.7)                                                                   | 124 (93.9)                                                                      | 8 (6.1)                                                           | 121 (91.7)                                                                    | 11 (8.3)                                                                | 130 (98.5)                                                                        | 2 (1.5)                                                         | 116 (87.9)                                                                    | 16 (12.1)                                                                | 84 (68.9)                                                                     | 38 (31.1)                                                                 |
|                                                  | Primary                                                                     | 283 (47.8)                                                                    | 309 (52.2)                                                                  | 538 (90.9)                                                                      | 54 (9.1)                                                          | 519 (87.7)                                                                    | 73 (12.3)                                                               | 582 (98.3)                                                                        | 10 (1.7)                                                        | 474 (80.1)                                                                    | 118 (19.9)                                                               | 375 (67.9)                                                                    | 177 (32.1)                                                                |
|                                                  | Complementary                                                               | 435 (45.5)                                                                    | 520 (54.5)                                                                  | 882 (92.4)                                                                      | 73 (7.6)                                                          | 810 (84.8)                                                                    | 145 (15.2)                                                              | 936 (98.0)                                                                        | 19 (2.0)                                                        | 759 (79.5)                                                                    | 196 (20.5)                                                               | 606 (69.0)                                                                    | 272 (31.0)                                                                |
|                                                  | Secondary                                                                   | 351 (49.9)                                                                    | 352 (50.1)                                                                  | 676 (96.2)                                                                      | 27 (3.8)                                                          | 576 (81.9)                                                                    | 127 (18.1)                                                              | 690 (98.2)                                                                        | 13 (1.8)                                                        | 580 (82.5)                                                                    | 123 (17.5)                                                               | 490 (78.1)                                                                    | 137 (21.9)                                                                |
|                                                  | Undergraduate                                                               | 152 (53.7)                                                                    | 131 (46.3)                                                                  | 273 (96.5)                                                                      | 10 (3.5)                                                          | 249 (88.0)                                                                    | 34 (12.0)                                                               | 280 (98.9)                                                                        | 3 (1.1)                                                         | 227 (80.2)                                                                    | 56 (19.8)                                                                | 207 (80.2)                                                                    | 51 (19.8)                                                                 |
|                                                  | University graduate                                                         | 261 (57.6)                                                                    | 192 (42.4)                                                                  | 445 (98.2)                                                                      | 8 (1.8)                                                           | 399 (88.1)                                                                    | 54 (11.9)                                                               | 449 (99.1)                                                                        | 4 (0.9)                                                         | 395 (87.2)                                                                    | 58 (12.8)                                                                | 339 (79.4)                                                                    | 88 (20.6)                                                                 |
|                                                  |                                                                             | p*                                                                            |                                                                             | p*                                                                              |                                                                   | p*                                                                            |                                                                         | NS                                                                                |                                                                 | p*                                                                            |                                                                          | p*                                                                            |                                                                           |
| Other factors                                    |                                                                             |                                                                               |                                                                             |                                                                                 |                                                                   |                                                                               |                                                                         |                                                                                   |                                                                 |                                                                               |                                                                          |                                                                               |                                                                           |
| Medical history                                  | No                                                                          | 838 (49.4)                                                                    | 858 (50.6)                                                                  | 1603 (94.5)                                                                     | 93 (5.5)                                                          | 1449 (85.4)                                                                   | 247 (14.6)                                                              | 1658 (97.8)                                                                       | 38 (2.2)                                                        | 1364 (80.4)                                                                   | 332 (19.6)                                                               | 1155 (74.7)                                                                   | 392 (25.3)                                                                |
|                                                  | Yes                                                                         | 831 (49.3)                                                                    | 853 (50.7)                                                                  | 1568 (93.1)                                                                     | 116 (6.9)                                                         | 1452 (86.2)                                                                   | 232 (13.8)                                                              | 1664 (98.8)                                                                       | 20 (1.2)                                                        | 1385 (82.2)                                                                   | 299 (17.8)                                                               | 1096 (70.9)                                                                   | 449 (29.1)                                                                |
|                                                  |                                                                             | NS                                                                            |                                                                             | NS                                                                              |                                                                   | NS                                                                            |                                                                         | p*                                                                                |                                                                 | NS                                                                            |                                                                          | p*                                                                            |                                                                           |
| Ongoing treat-<br>ment                           | No                                                                          | 1400 (49.2)                                                                   | 1444 (50.8)                                                                 | 2661 (93.6)                                                                     | 183 (6.4)                                                         | 2434 (85.6)                                                                   | 410 (14.4)                                                              | 2790 (98.1)                                                                       | 54 (1.9)                                                        | 2334 (82.1)                                                                   | 510 (17.9)                                                               | 1888 (72.5)                                                                   | 717 (27.5)                                                                |
|                                                  | Yes                                                                         | 240 (49.3)                                                                    | 247 (50.7)                                                                  | 469 (96.3)                                                                      | 18 (3.7)                                                          | 430 (88.3)                                                                    | 57 (11.7)                                                               | 480 (98.6)                                                                        | 7 (1.4)                                                         | 384 (78.9)                                                                    | 103 (21.1)                                                               | 341 (76.5)                                                                    | 105 (23.5)                                                                |
|                                                  |                                                                             | NS                                                                            |                                                                             | p*                                                                              |                                                                   | NS                                                                            |                                                                         | NS                                                                                |                                                                 | NS                                                                            |                                                                          | NS                                                                            |                                                                           |
| Child visit to the<br>pediatrician/doctor        | No                                                                          | 291 (42.9)                                                                    | 388 (57.1)                                                                  | 632 (93.1)                                                                      | 47 (6.9)                                                          | 562 (82.8)                                                                    | 117 (17.2)                                                              | 664 (97.8)                                                                        | 15 (2.2)                                                        | 548 (80.7)                                                                    | 131 (19.3)                                                               | 435 (70.4)                                                                    | 183 (29.6)                                                                |
|                                                  | Yes                                                                         | 1330 (50.8)                                                                   | 1288 (49.2)                                                                 | 2466 (94.2)                                                                     | 152 (5.8)                                                         | 2270 (86.7)                                                                   | 348 (13.3)                                                              | 2572 (98.2)                                                                       | 46 (1.8)                                                        | 2139 (81.7)                                                                   | 479 (18.3)                                                               | 1772 (73.7)                                                                   | 631 (26.3)                                                                |
|                                                  |                                                                             | p*                                                                            |                                                                             | NS                                                                              |                                                                   | p*                                                                            |                                                                         | NS                                                                                |                                                                 | NS                                                                            |                                                                          | NS                                                                            |                                                                           |
| Previous child<br>visit to the psy-<br>chologist | No                                                                          | 1608 (50.3)                                                                   | 1588 (49.7)                                                                 | 3008 (94.1)                                                                     | 188 (5.9)                                                         | 2751 (86.1)                                                                   | 445 (13.9)                                                              | 3147 (98.5)                                                                       | 49 (1.5)                                                        | 2618 (81.9)                                                                   | 578 (18.1)                                                               | 2163 (73.6)                                                                   | 777 (26.4)                                                                |
|                                                  | Yes                                                                         | 62 (43.4)                                                                     | 81 (56.6)                                                                   | 135 (94.4)                                                                      | 8 (5.6)                                                           | 113 (79.0)                                                                    | 30 (21.0)                                                               | 138 (96.5)                                                                        | 5 (3.5)                                                         | 115 (80.4)                                                                    | 28 (19.6)                                                                | 89 (68.5)                                                                     | 41 (31.5)                                                                 |
|                                                  |                                                                             | NS                                                                            |                                                                             | NS                                                                              |                                                                   | p*                                                                            |                                                                         | NS                                                                                |                                                                 | NS                                                                            |                                                                          | NS                                                                            |                                                                           |

p\* = p &lt; 0.05

NS = Non-significant p value &gt; 0.05

Table S1B. Associations between referrals &amp; sociodemographic data and other factors

| Referrals                |               | Referral for abnormal vital signs<br>N (%) |              | Referral for atypical skin lesions (signs of abuse)<br>N (%) |             | Referral for infectious skin lesions<br>N (%) |             | Referral for abnormal posture<br>N (%) |             | Referral for abnormal heart auscultation<br>N (%) |             |
|--------------------------|---------------|--------------------------------------------|--------------|--------------------------------------------------------------|-------------|-----------------------------------------------|-------------|----------------------------------------|-------------|---------------------------------------------------|-------------|
|                          |               | No                                         | Yes          | No                                                           | Yes         | No                                            | Yes         | No                                     | Yes         | No                                                | Yes         |
| Sociodemographic factors |               |                                            |              |                                                              |             |                                               |             |                                        |             |                                                   |             |
| Nationality              | Lebanese      | 6469 (96.9)                                | 207 (3.1)    | 6645 (99.4)                                                  | 37 (0.6)    | 6572 (98.4)                                   | 110 (1.6)   | 6567 (98.3)                            | 115 (1.7)   | 6606 (98.9)                                       | 76 (1.1)    |
|                          | Syrian        | 468 (97.9)                                 | 10 (2.1)     | 474 (98.8)                                                   | 6 (1.3)     | 474 (98.8)                                    | 6 (1.3)     | 475 (99.0)                             | 5 (1.0)     | 476 (99.2)                                        | 4 (0.8)     |
|                          | Palestinian   | 8 (100.0)                                  | 0 (0.0)      | 8 (100.0)                                                    | 0 (0.0)     | 8 (100.0)                                     | 0 (0.0)     | 8 (100.0)                              | 0 (0.0)     | 8 (100.0)                                         | 0 (0.0)     |
|                          | Other         | 13 (92.9)                                  | 1 (7.1) NS   | 14 (100.0)                                                   | 0 (0.0) NS  | 12 (85.7)                                     | 2 (14.3) p* | 14 (100.0)                             | 0 (0.0) NS  | 14 (100.0)                                        | 0 (0.0) NS  |
| Gender                   | Male          | 3391 (97.2)                                | 98 (2.8)     | 3467 (99.3)                                                  | 24 (0.7)    | 3448 (98.8)                                   | 43 (1.2)    | 3450 (98.8)                            | 41 (1.2)    | 3453 (98.9)                                       | 38 (1.1)    |
|                          | Female        | 3567 (96.7)                                | 120 (3.3) NS | 3674 (99.5)                                                  | 19 (0.5) NS | 3618 (98.0)                                   | 75 (2.0) p* | 3614 (97.9)                            | 79 (2.1) p* | 3651 (98.9)                                       | 42 (1.1) NS |
| Age                      | 3-6 years     | 2588 (97.5)                                | 66 (2.5)     | 2641 (99.4)                                                  | 16 (0.6)    | 2610 (98.2)                                   | 47 (1.8)    | 2635 (99.2)                            | 22 (0.8)    | 2622 (98.7)                                       | 35 (1.3)    |
|                          | 7-9 years     | 2238 (97.2)                                | 64 (2.8)     | 2288 (99.3)                                                  | 17 (0.7)    | 2259 (98.0)                                   | 46 (2.0)    | 2257 (97.9)                            | 48 (2.1)    | 2280 (98.9)                                       | 25 (1.1)    |
|                          | 10-12 years   | 2132 (96.0)                                | 88 (4.0) p*  | 2212 (99.5)                                                  | 10 (0.5) NS | 2197 (98.9)                                   | 25 (1.1) NS | 2172 (97.7)                            | 50 (2.3) p* | 2202 (99.1)                                       | 20 (0.9) NS |
| BMI                      | Underweight   | 1895 (98.4)                                | 31 (1.6)     | 1916 (99.5)                                                  | 10 (0.5)    | 1904 (98.9)                                   | 22 (1.1)    | 1907 (99.0)                            | 19 (1.0)    | 1904 (98.9)                                       | 22 (1.1)    |
|                          | Normal weight | 2784 (96.9)                                | 88 (3.1)     | 2864 (99.6)                                                  | 12 (0.4)    | 2828 (98.3)                                   | 48 (1.7)    | 2825 (98.2)                            | 51 (1.8)    | 2844 (98.9)                                       | 32 (1.1)    |
|                          | Overweight    | 2542 (95.8)                                | 99 (4.2) p*  | 2361 (99.1)                                                  | 21 (1.9) NS | 2334 (98.0)                                   | 48 (2.0) NS | 2332 (97.9)                            | 50 (2.1) p* | 2356 (98.9)                                       | 26 (1.1) NS |
| Governorate              | Beirut        | 276 (93.9)                                 | 18 (6.1)     | 291 (99.0)                                                   | 3 (1.0)     | 278 (94.6)                                    | 16 (5.4)    | 292 (99.3)                             | 2 (0.7)     | 288 (98.0)                                        | 6 (2.0)     |
|                          | Mount Lebanon | 159 (93.5)                                 | 11 (6.5)     | 167 (98.2)                                                   | 3 (1.8)     | 162 (95.3)                                    | 8 (4.7)     | 160 (94.1)                             | 10 (5.9)    | 168 (98.8)                                        | 2 (1.2)     |
|                          | North/Akkar   | 1162 (96.7)                                | 40 (3.3)     | 1193 (99.0)                                                  | 12 (1.0)    | 1180 (97.9)                                   | 25 (2.1)    | 1189 (98.7)                            | 16 (1.3)    | 1183 (98.2)                                       | 22 (1.8)    |
|                          | Beqaa/Baalbek | 3281 (97.1)                                | 98 (2.9)     | 3367 (99.6)                                                  | 15 (0.4)    | 3327 (98.4)                                   | 55 (1.6)    | 3332 (98.5)                            | 50 (1.5)    | 3356 (99.2)                                       | 26 (0.8)    |
|                          | South         | 2080 (97.6)                                | 51 (2.4) p*  | 2123 (99.5)                                                  | 10 (0.5) p* | 2119 (99.3)                                   | 14 (0.7) p* | 2091 (98.0)                            | 42 (2.0) p* | 2109 (98.9)                                       | 24 (1.1) p* |
| School type              | Public        | 2334 (95.3)                                | 114 (4.7)    | 2430 (99.1)                                                  | 21 (0.9)    | 2395 (97.7)                                   | 56 (2.3)    | 2421 (98.8)                            | 30 (1.2)    | 2419 (98.7)                                       | 32 (1.3)    |
|                          | Private       | 4624 (97.8)                                | 104 (2.2) p* | 4711 (99.5)                                                  | 22 (0.5) p* | 4671 (98.7)                                   | 62 (1.3) p* | 4643 (98.1)                            | 90 (1.9) p* | 4685 (99.0)                                       | 48 (1.0) NS |
| Family income            | No income     | 267 (96.4)                                 | 10 (3.6)     | 276 (99.6)                                                   | 1 (0.4)     | 273 (98.6)                                    | 4 (1.4)     | 270 (97.5)                             | 7 (2.5)     | 274 (98.9)                                        | 3 (1.1)     |
|                          | <100\$        | 1169 (95.2)                                | 59 (4.8)     | 1223 (99.4)                                                  | 8 (0.6)     | 1205 (97.9)                                   | 26 (2.1)    | 1211 (98.4)                            | 20 (1.6)    | 1217 (98.9)                                       | 14 (1.1)    |
|                          | 100-300\$     | 324 (97.9)                                 | 7 (2.1)      | 329 (99.1)                                                   | 3 (0.9)     | 323 (97.3)                                    | 9 (2.7)     | 325 (97.9)                             | 7 (2.1)     | 329 (99.1)                                        | 3 (0.9)     |
|                          | 300-600\$     | 881 (97.7)                                 | 21 (2.3)     | 898 (99.6)                                                   | 4 (0.4)     | 887 (98.3)                                    | 15 (1.7)    | 883 (97.9)                             | 19 (2.1)    | 891 (98.8)                                        | 11 (1.2)    |
|                          | 600-900\$     | 222 (97.8)                                 | 5 (2.2)      | 225 (99.1)                                                   | 2 (0.9)     | 222 (97.8)                                    | 5 (2.2)     | 225 (99.1)                             | 2 (0.9)     | 226 (99.6)                                        | 1 (0.4)     |
|                          | >900\$        | 26 (96.3)                                  | 1 (3.7) p*   | 26 (96.3)                                                    | 1 (3.7) NS  | 27 (100.0)                                    | 0 (0.0) NS  | 25 (92.6)                              | 2 (7.4) NS  | 27 (100.0)                                        | 0 (0.0) NS  |
| Mother's occupation      | No work       | 3 (100.0)                                  | 0 (0.0)      | 3 (100.0)                                                    | 0 (0.0)     | 3 (100.0)                                     | 0 (0.0)     | 3 (100.0)                              | 0 (0.0)     | 3 (100.0)                                         | 0 (0.0)     |
|                          | Housewife     | 2168 (96.4)                                | 81 (3.6)     | 2237 (99.4)                                                  | 14 (0.6)    | 2219 (98.6)                                   | 32 (1.4)    | 2208 (98.1)                            | 43 (1.9)    | 2230 (99.1)                                       | 21 (0.9)    |

|                                          |                     |             |             |             |             |             |             |             |             |             |             |
|------------------------------------------|---------------------|-------------|-------------|-------------|-------------|-------------|-------------|-------------|-------------|-------------|-------------|
|                                          | Student             | 16 (100.0)  | 0 (0.0)     | 16 (100.0)  | 0 (0.0)     | 16 (100.0)  | 0 (0.0)     | 15 (93.8)   | 1 (6.3)     | 16 (100.0)  | 0 (0.0)     |
|                                          | Employed            | 571 (97.1)  | 17 (2.9)    | 584 (99.2)  | 5 (0.8)     | 574 (97.5)  | 15 (2.5)    | 580 (98.5)  | 9 (1.5)     | 582 (98.8)  | 7 (1.2)     |
|                                          | Self-employed       | 130 (97.7)  | 3 (2.3)     | 134 (100.0) | 0 (0.0)     | 132 (98.5)  | 2 (1.5)     | 132 (98.5)  | 2 (1.5)     | 131 (97.8)  | 3 (2.2)     |
|                                          | Unemployed          | 88 (100.0)  | 0 (0.0)     | 87 (98.9)   | 1 (1.1)     | 86 (97.7)   | 2 (2.3)     | 88 (100.0)  | 0 (0.0)     | 88 (100.0)  | 0 (0.0)     |
|                                          | Retired             | 9 (100.0)   | 0 (0.0)     | 9 (100.0)   | 0 (0.0)     | 9 (100.0)   | 0 (0.0)     | 9 (100.0)   | 0 (0.0)     | 9 (100.0)   | 0 (0.0)     |
|                                          | Disabled            | 2 (100.0)   | 0 (0.0)     | 2 (100.0)   | 0 (0.0)     | 2 (100.0)   | 0 (0.0)     | 2 (100.0)   | 0 (0.0)     | 2 (100.0)   | 0 (0.0)     |
|                                          | Health field        | 76 (100.0)  | 0 (0.0)     | 76 (100.0)  | 0 (0.0)     | 74 (97.4)   | 2 (2.6)     | 74 (97.4)   | 2 (2.6)     | 75 (98.7)   | 1 (1.3)     |
|                                          | Other               | 31 (93.9)   | 2 (6.1) NS  | 33 (100.0)  | 0 (0.0) NS  | 30 (90.9)   | 3 (9.1) NS  | 33 (100.0)  | 0 (0.0) p*  | 32 (97.0)   | 1 (3.0) NS  |
| Father's occupation                      | No work             | 8 (100.0)   | 0 (0.0)     | 8 (100.0)   | 0 (0.0)     | 8 (100.0)   | 0 (0.0)     | 8 (100.0)   | 0 (0.0)     | 7 (87.5)    | 1 (12.5)    |
|                                          | Housewife           | 5 (100.0)   | 0 (0.0)     | 5 (100.0)   | 0 (0.0)     | 5 (100.0)   | 0 (0.0)     | 5 (100.0)   | 0 (0.0)     | 5 (100.0)   | 0 (0.0)     |
|                                          | Student             | 11 (100.0)  | 0 (0.0)     | 11 (100.0)  | 0 (0.0)     | 11 (100.0)  | 0 (0.0)     | 11 (100.0)  | 0 (0.0)     | 11 (100.0)  | 0 (0.0)     |
|                                          | Employed            | 1311 (97.6) | 32 (2.4)    | 1338 (99.5) | 7 (0.5)     | 1325 (98.5) | 20 (1.5)    | 1328 (98.7) | 17 (1.3)    | 1333 (99.1) | 12 (0.9)    |
|                                          | Self-employed       | 1075 (96.8) | 35 (3.2)    | 1103 (99.4) | 7 (0.6)     | 1091 (98.3) | 19 (1.7)    | 1083 (97.6) | 27 (2.4)    | 1100 (99.1) | 10 (0.9)    |
|                                          | Unemployed          | 205 (96.2)  | 8 (3.8)     | 212 (99.5)  | 1 (0.5)     | 211 (99.1)  | 2 (0.9)     | 210 (98.6)  | 3 (1.4)     | 209 (98.1)  | 4 (1.9)     |
|                                          | Retired             | 106 (89.8)  | 12 (10.2)   | 115 (97.5)  | 3 (2.5)     | 117 (99.2)  | 1 (0.8)     | 115 (97.5)  | 3 (2.5)     | 118 (100.0) | 0 (0.0)     |
|                                          | Disabled            | 17 (100.0)  | 0 (0.0)     | 16 (94.1)   | 1 (5.9)     | 17 (100.0)  | 0 (0.0)     | 17 (100.0)  | 0 (0.0)     | 17 (100.0)  | 0 (0.0)     |
|                                          | Health field        | 35 (100.0)  | 0 (0.0)     | 35 (100.0)  | 0 (0.0)     | 33 (94.3)   | 2 (5.7)     | 35 (100.0)  | 0 (0.0)     | 34 (97.1)   | 1 (2.9)     |
|                                          | Other               | 221 (94.8)  | 12 (5.2) p* | 234 (100.0) | 0 (0.0) p*  | 228 (97.4)  | 6 (2.6) NS  | 230 (98.3)  | 4 (1.7) NS  | 231 (98.7)  | 3 (1.3) NS  |
| Mother's level of education              | No education        | 70 (95.9)   | 3 (4.1)     | 73 (100.0)  | 0 (0.0)     | 71 (97.3)   | 2 (2.7)     | 73 (100.0)  | 0 (0.0)     | 73 (100.0)  | 0 (0.0)     |
|                                          | Primary             | 381 (96.0)  | 16 (4.0)    | 394 (98.7)  | 5 (1.3)     | 391 (98.0)  | 8 (2.0)     | 393 (98.5)  | 6 (1.5)     | 394 (98.7)  | 5 (1.3)     |
|                                          | Complementary       | 699 (96.8)  | 23 (3.2)    | 718 (99.4)  | 4 (0.6)     | 704 (97.5)  | 18 (2.5)    | 707 (97.9)  | 15 (2.1)    | 715 (99.0)  | 7 (1.0)     |
|                                          | Secondary           | 680 (96.6)  | 24 (3.4)    | 702 (99.6)  | 3 (0.4)     | 696 (98.7)  | 9 (1.3)     | 693 (98.3)  | 12 (1.7)    | 697 (98.9)  | 8 (1.1)     |
|                                          | Undergraduate       | 420 (96.3)  | 16 (3.7)    | 433 (99.3)  | 3 (0.7)     | 429 (98.4)  | 7 (1.6)     | 424 (97.2)  | 12 (2.8)    | 433 (99.3)  | 3 (0.7)     |
|                                          | University graduate | 885 (97.7)  | 21 (2.3) NS | 902 (99.4)  | 5 (0.6) NS  | 895 (98.7)  | 12 (1.3) NS | 895 (98.7)  | 12 (1.3) NS | 896 (98.8)  | 11 (1.2) NS |
| Father's level of education              | No education        | 128 (97.0)  | 4 (3.0)     | 130 (98.5)  | 2 (1.5)     | 129 (97.7)  | 3 (2.3)     | 130 (98.5)  | 2 (1.5)     | 131 (99.2)  | 1 (0.8)     |
|                                          | Primary             | 578 (97.6)  | 14 (2.4)    | 587 (99.2)  | 5 (0.8)     | 582 (98.3)  | 10 (1.7)    | 578 (97.6)  | 14 (2.4)    | 585 (98.8)  | 7 (1.2)     |
|                                          | Complementary       | 915 (96.0)  | 38 (4.0)    | 950 (99.5)  | 5 (0.5)     | 937 (98.1)  | 18 (1.9)    | 938 (98.2)  | 17 (1.8)    | 945 (99.0)  | 10 (1.0)    |
|                                          | Secondary           | 681 (97.0)  | 21 (3.0)    | 698 (99.3)  | 5 (0.7)     | 695 (98.9)  | 8 (1.1)     | 693 (98.6)  | 10 (1.4)    | 696 (99.0)  | 7 (1.0)     |
|                                          | Undergraduate       | 274 (96.8)  | 9 (3.2)     | 281 (99.3)  | 2 (0.7)     | 278 (98.2)  | 5 (1.8)     | 278 (98.2)  | 5 (1.8)     | 280 (98.9)  | 3 (1.1)     |
|                                          | University graduate | 439 (96.9)  | 14 (3.1) NS | 453 (100.0) | 0 (0.0) NS  | 446 (98.5)  | 7 (1.5) NS  | 447 (98.7)  | 6 (1.3) NS  | 450 (99.3)  | 3 (0.7) NS  |
| Other factors                            |                     |             |             |             |             |             |             |             |             |             |             |
| Medical history                          | No                  | 1640 (96.8) | 54 (3.2)    | 1685 (99.4) | 11 (0.6)    | 1655 (97.6) | 41 (2.4)    | 1660 (97.9) | 36 (2.1)    | 1675 (98.8) | 21 (1.2)    |
|                                          | Yes                 | 1625 (96.5) | 59 (3.5) NS | 1671 (99.2) | 13 (0.8) NS | 1662 (98.7) | 22 (1.3) p* | 1654 (98.2) | 30 (1.8) NS | 1665 (98.9) | 19 (1.1) NS |
| Ongoing treatment                        | No                  | 2756 (96.9) | 88 (3.1)    | 2825 (99.3) | 19 (0.7)    | 2788 (98.0) | 56 (2.0)    | 2789 (98.1) | 55 (1.9)    | 2811 (98.8) | 33 (1.2)    |
|                                          | Yes                 | 473 (97.3)  | 13 (2.7) NS | 487 (100.0) | 0 (0.0) NS  | 477 (97.9)  | 10 (2.1) NS | 479 (98.4)  | 8 (1.6) NS  | 481 (98.8)  | 6 (1.2) NS  |
| Child visit to the pediatrician/doctor   | No                  | 652 (96.2)  | 26 (3.8)    | 667 (98.2)  | 12 (1.8)    | 660 (97.2)  | 19 (2.8)    | 663 (97.6)  | 16 (2.4)    | 670 (98.7)  | 9 (1.3)     |
|                                          | Yes                 | 2543 (97.1) | 75 (2.9) NS | 2611 (99.7) | 7 (0.3) p*  | 2571 (98.2) | 47 (1.8) NS | 2572 (98.2) | 46 (1.8) NS | 2589 (98.9) | 29 (1.1) NS |
| Previous child visit to the psychologist | No                  | 3091 (96.8) | 101 (3.2)   | 3177 (99.4) | 19 (0.6)    | 3138 (98.2) | 58 (1.8)    | 3143 (98.3) | 53 (1.7)    | 3163 (99.0) | 33 (1.0)    |
|                                          | Yes                 | 137 (95.8)  | 6 (4.2) NS  | 141 (98.6)  | 2 (1.4) NS  | 142 (99.3)  | 1 (0.7) NS  | 140 (97.9)  | 3 (2.1) NS  | 143 (100.0) | 0 (0.0) NS  |

p\* = p &lt; 0.05

NS = Non-significant p value &gt; 0.05

Table S1C. Associations between referrals &amp; sociodemographic data and other factors

| Referrals     |               | Referral for abnormal lung auscultation<br>N (%) |             | Referral for enlarged node or/and organ<br>N (%) |             | Referral for abnormal ear exam<br>N (%) |              | Referral for signs of early puberty<br>N (%) |             | Referral for abnormal neurological findings<br>N (%) |             |
|---------------|---------------|--------------------------------------------------|-------------|--------------------------------------------------|-------------|-----------------------------------------|--------------|----------------------------------------------|-------------|------------------------------------------------------|-------------|
|               |               | No                                               | Yes         | No                                               | Yes         | No                                      | Yes          | No                                           | Yes         | No                                                   | Yes         |
| Nationality   | Lebanese      | 6601 (98.8)                                      | 81 (1.2)    | 6632 (99.3)                                      | 50 (0.7)    | 6383 (95.5)                             | 299 (4.5)    | 6626 (99.3)                                  | 49 (0.7)    | 6638 (99.3)                                          | 44 (0.7)    |
|               | Syrian        | 478 (99.6)                                       | 2 (0.4)     | 480 (100.0)                                      | 0 (0.0)     | 467 (97.3)                              | 13 (2.7)     | 474 (99.6)                                   | 2 (0.4)     | 479 (99.8)                                           | 1 (0.2)     |
|               | Palestinian   | 8 (100.0)                                        | 0 (0.0)     | 8 (100.0)                                        | 0 (0.0)     | 8 (100.0)                               | 0 (0.0)      | 8 (100.0)                                    | 0 (0.0)     | 8 (100.0)                                            | 0 (0.0)     |
|               | Other         | 14 (100.0)                                       | 0 (0.0) NS  | 14 (100.0)                                       | 0 (0.0) NS  | 14 (100.0)                              | 0 (0.0) NS   | 14 (100.0)                                   | 0 (0.0) NS  | 14 (100.0)                                           | 0 (0.0) NS  |
| Gender        | Male          | 3450 (98.8)                                      | 41 (1.2)    | 3462 (99.2)                                      | 29 (0.8)    | 3340 (95.7)                             | 151 (4.3)    | 3452 (99.1)                                  | 33 (0.9)    | 3468 (99.3)                                          | 23 (0.7)    |
|               | Female        | 3651 (98.9)                                      | 42 (1.1) NS | 3672 (99.4)                                      | 21 (0.6) NS | 3532 (95.6)                             | 161 (4.4) NS | 3670 (99.5)                                  | 18 (0.5) p* | 3671 (99.4)                                          | 22 (0.6) NS |
| Age           | 3-6 years     | 2602 (97.9)                                      | 55 (2.1)    | 2635 (99.2)                                      | 22 (0.8)    | 2501 (94.1)                             | 156 (5.9)    | 2640 (99.4)                                  | 17 (0.6)    | 2635 (99.2)                                          | 22 (0.8)    |
|               | 7-9 years     | 2288 (99.3)                                      | 17 (0.7)    | 2293 (99.5)                                      | 12 (0.5)    | 2238 (97.1)                             | 67 (2.9)     | 2270 (98.5)                                  | 34 (1.5)    | 2294 (99.5)                                          | 11 (0.5)    |
|               | 10-12 years   | 2211 (99.5)                                      | 11 (0.5) p* | 2206 (99.3)                                      | 16 (0.7) NS | 2133 (96.0)                             | 89 (4.0) p*  | 2212 (100.0)                                 | 0 (0.0) p*  | 2210 (99.5)                                          | 12 (0.5) NS |
| BMI           | Underweight   | 1913 (99.3)                                      | 13 (0.7)    | 1911 (99.2)                                      | 15 (0.8)    | 1853 (96.2)                             | 73 (3.8)     | 1910 (99.2)                                  | 15 (0.8)    | 1918 (99.6)                                          | 8 (0.4)     |
|               | Normal weight | 2827 (98.3)                                      | 49 (1.7)    | 2854 (99.2)                                      | 22 (0.8)    | 2739 (95.2)                             | 137 (4.8)    | 2846 (99.2)                                  | 24 (0.8)    | 2852 (99.2)                                          | 24 (0.8)    |
|               | Overweight    | 2361 (99.1)                                      | 21 (0.9) p* | 2369 (99.5)                                      | 13 (0.5) NS | 2280 (95.7)                             | 102 (4.3) NS | 2366 (99.5)                                  | 12 (0.5) NS | 2369 (99.5)                                          | 13 (0.5) NS |
| Governorate   | Beirut        | 291 (99.0)                                       | 3 (1.0)     | 291 (99.0)                                       | 3 (1.0)     | 258 (87.8)                              | 36 (12.2)    | 288 (98.0)                                   | 6 (2.0)     | 292 (99.3)                                           | 2 (0.7)     |
|               | Mount Lebanon | 170 (100.0)                                      | 0 (0.0)     | 170 (100.0)                                      | 0 (0.0)     | 167 (98.2)                              | 3 (1.8)      | 167 (98.8)                                   | 2 (1.2)     | 168 (98.8)                                           | 2 (1.2)     |
|               | North/Akkar   | 1192 (98.9)                                      | 13 (1.1)    | 1202 (99.8)                                      | 3 (0.2)     | 1167 (96.8)                             | 38 (3.2)     | 1197 (99.5)                                  | 6 (0.5)     | 1197 (99.3)                                          | 8 (0.7)     |
|               | Beqaa/Baalbek | 3344 (98.9)                                      | 38 (1.1)    | 3343 (98.8)                                      | 39 (1.2)    | 3202 (94.7)                             | 180 (5.3)    | 3348 (99.0)                                  | 33 (1.0)    | 3360 (99.3)                                          | 22 (0.7)    |
|               | South         | 2104 (98.6)                                      | 29 (1.4) NS | 2128 (99.8)                                      | 5 (0.2) p*  | 2078 (97.4)                             | 55 (2.6) p*  | 2122 (99.8)                                  | 4 (0.2) p*  | 2122 (99.5)                                          | 11 (0.5) NS |
| School type   | Public        | 2427 (99.0)                                      | 24 (1.0)    | 2440 (99.6)                                      | 11 (0.4)    | 2382 (97.2)                             | 69 (2.8)     | 2424 (99.3)                                  | 17 (0.7)    | 2436 (99.4)                                          | 15 (0.6)    |
|               | Private       | 4674 (98.8)                                      | 59 (1.2) NS | 4694 (99.2)                                      | 39 (0.8) NS | 4490 (94.9)                             | 243 (5.1) p* | 4698 (99.3)                                  | 34 (0.7) NS | 4703 (99.4)                                          | 30 (0.6) NS |
| Family income | No income     | 273 (98.6)                                       | 4 (1.4)     | 275 (99.3)                                       | 2 (0.7)     | 261 (94.2)                              | 16 (5.8)     | 275 (100.0)                                  | 0 (0.0)     | 275 (99.3)                                           | 2 (0.7)     |
|               | <100\$        | 1214 (98.6)                                      | 17 (1.4)    | 1215 (98.7)                                      | 16 (1.3)    | 1165 (94.6)                             | 66 (5.4)     | 1221 (99.3)                                  | 8 (0.7)     | 1224 (99.4)                                          | 7 (0.6)     |
|               | 100-300\$     | 328 (98.8)                                       | 4 (1.2)     | 329 (99.1)                                       | 3 (0.9)     | 316 (95.2)                              | 16 (4.8)     | 331 (99.7)                                   | 1 (0.3)     | 327 (98.5)                                           | 5 (1.5)     |
|               | 300-600\$     | 894 (99.1)                                       | 8 (0.9)     | 901 (99.9)                                       | 1 (0.1)     | 859 (95.2)                              | 43 (4.8)     | 887 (98.3)                                   | 15 (1.7)    | 898 (99.6)                                           | 4 (0.4)     |

|                                          |                     |             |              |             |             |             |              |             |             |             |             |
|------------------------------------------|---------------------|-------------|--------------|-------------|-------------|-------------|--------------|-------------|-------------|-------------|-------------|
|                                          | 600-900\$           | 222 (97.8)  | 5 (2.2)      | 223 (98.2)  | 4 (1.8)     | 212 (93.4)  | 15 (6.6)     | 225 (99.1)  | 2 (0.9)     | 226 (99.6)  | 1 (0.4)     |
|                                          | >900\$              | 26 (96.3)   | 1 (3.7) NS   | 27 (100.0)  | 0 (0.0) p*  | 27 (100.0)  | 0 (0.0) NS   | 27 (100.0)  | 0 (0.0) p*  | 27 (100.0)  | 0 (0.0) NS  |
| Mother's occupation                      | No work             | 3 (100.0)   | 0 (0.0)      | 3 (100.0)   | 0 (0.0)     | 3 (100.0)   | 0 (0.0)      | 3 (100.0)   | 0 (0.0)     | 3 (100.0)   | 0 (0.0)     |
|                                          | Housewife           | 2223 (98.8) | 1137 (50.5)  | 2234 (99.2) | 148 (6.6)   | 2138 (95.0) | 316 (14.0)   | 2232 (99.3) | 35 (1.6)    | 2239 (99.5) | 432 (19.2)  |
|                                          | Student             | 16 (100.0)  | 4 (25.0)     | 16 (100.0)  | 0 (0.0)     | 16 (100.0)  | 3 (18.8)     | 16 (100.0)  | 0 (0.0)     | 16 (100.0)  | 1 (6.3)     |
|                                          | Employed            | 582 (98.8)  | 297 (50.4)   | 584 (99.2)  | 22 (3.7)    | 561 (95.2)  | 98 (16.6)    | 582 (98.8)  | 15 (2.5)    | 583 (99.0)  | 95 (16.1)   |
|                                          | Self-employed       | 133 (99.3)  | 66 (49.3)    | 134 (100.0) | 9 (6.7)     | 125 (93.3)  | 17 (12.7)    | 133 (99.3)  | 1 (0.7)     | 134 (100.0) | 23 (17.2)   |
|                                          | Unemployed          | 87 (98.9)   | 44 (50.0)    | 87 (98.9)   | 2 (2.3)     | 86 (97.7)   | 11 (12.5)    | 86 (97.7)   | 1 (1.1)     | 88 (100.0)  | 11 (12.5)   |
|                                          | Retired             | 9 (100.0)   | 0 (0.0)      | 9 (100.0)   | 0 (0.0)     | 9 (100.0)   | 0 (0.0)      | 9 (100.0)   | 0 (0.0)     | 9 (100.0)   | 0 (0.0)     |
|                                          | Disabled            | 2 (100.0)   | 1 (50.0)     | 2 (100.0)   | 0 (0.0)     | 2 (100.0)   | 1 (50.0)     | 2 (100.0)   | 0 (0.0)     | 2 (100.0)   | 0 (0.0)     |
|                                          | Health field        | 74 (97.4)   | 29 (38.2)    | 74 (97.4)   | 1 (1.3)     | 74 (97.4)   | 6 (7.9)      | 76 (100.0)  | 0 (0.0)     | 76 (100.0)  | 7 (9.2)     |
|                                          | Other               | 33 (100.0)  | 19 (57.6) p* | 33 (100.0)  | 0 (0.0) NS  | 32 (97.0)   | 4 (12.1) NS  | 33 (100.0)  | 2 (6.1) NS  | 33 (100.0)  | 7 (21.2) NS |
| Father's occupation                      | No work             | 8 (100.0)   | 0 (0.0)      | 8 (100.0)   | 0 (0.0)     | 8 (100.0)   | 0 (0.0)      | 8 (100.0)   | 0 (0.0)     | 8 (100.0)   | 0 (0.0)     |
|                                          | Housewife           | 5 (100.0)   | 0 (0.0)      | 5 (100.0)   | 0 (0.0)     | 4 (80.0)    | 1 (20.0)     | 5 (100.0)   | 0 (0.0)     | 5 (100.0)   | 0 (0.0)     |
|                                          | Student             | 11 (100.0)  | 0 (0.0)      | 11 (100.0)  | 0 (0.0)     | 11 (100.0)  | 0 (0.0)      | 11 (100.0)  | 0 (0.0)     | 11 (100.0)  | 0 (0.0)     |
|                                          | Employed            | 1324 (98.4) | 21 (1.6)     | 1329 (98.8) | 16 (1.2)    | 1274 (94.7) | 71 (5.3)     | 1331 (99.0) | 14 (1.0)    | 1334 (99.2) | 11 (0.8)    |
|                                          | Self-employed       | 1097 (98.8) | 13 (1.2)     | 1103 (99.4) | 7 (0.6)     | 1053 (94.9) | 57 (5.1)     | 1098 (99.1) | 10 (0.9)    | 1107 (99.7) | 3 (0.3)     |
|                                          | Unemployed          | 211 (99.1)  | 2 (0.9)      | 213 (100.0) | 0 (0.0)     | 203 (95.3)  | 10 (4.7)     | 213 (100.0) | 0 (0.0)     | 212 (99.5)  | 1 (0.5)     |
|                                          | Retired             | 118 (100.0) | 0 (0.0)      | 118 (100.0) | 0 (0.0)     | 113 (95.8)  | 5 (4.2)      | 118 (100.0) | 0 (0.0)     | 116 (98.3)  | 2 (1.7)     |
|                                          | Disabled            | 17 (100.0)  | 0 (0.0)      | 17 (100.0)  | 0 (0.0)     | 16 (94.1)   | 1 (5.9)      | 16 (94.1)   | 1 (5.9)     | 17 (100.0)  | 0 (0.0)     |
|                                          | Health field        | 35 (100.0)  | 0 (0.0)      | 35 (100.0)  | 0 (0.0)     | 33 (94.3)   | 2 (5.7)      | 34 (97.1)   | 1 (2.9)     | 35 (100.0)  | 0 (0.0)     |
|                                          | Other               | 231 (98.7)  | 3 (1.3) NS   | 233 (99.6)  | 1 (0.4) NS  | 227 (97.0)  | 7 (3.0) NS   | 234 (100.0) | 0 (0.0) NS  | 234 (100.0) | 0 (0.0) NS  |
| Mother's level of education              | No education        | 73 (100.0%) | 0 (0.0)      | 73 (100.0)  | 0 (0.0)     | 69 (94.5)   | 4 (5.5)      | 73 (100.0)  | 0 (0.0)     | 73 (100.0)  | 0 (0.0)     |
|                                          | Primary             | 397 (99.5%) | 2 (0.5)      | 394 (98.7)  | 5 (1.3)     | 376 (94.2)  | 23 (5.8)     | 399 (100.0) | 0 (0.0)     | 397 (99.5)  | 2 (0.5)     |
|                                          | Complementary       | 717 (99.3%) | 5 (0.7)      | 717 (99.3)  | 5 (0.7)     | 694 (96.1)  | 28 (3.9)     | 717 (99.4)  | 4 (0.6)     | 718 (99.4)  | 4 (0.6)     |
|                                          | Secondary           | 696 (98.7%) | 9 (1.3)      | 701 (99.4)  | 4 (0.6)     | 676 (95.9)  | 29 (4.1)     | 694 (98.7)  | 9 (1.3)     | 701 (99.4)  | 4 (0.6)     |
|                                          | Undergraduate       | 423 (97.0%) | 13 (3.0)     | 431 (98.9)  | 5 (1.1)     | 408 (93.6)  | 28 (6.4)     | 431 (98.9)  | 5 (1.1)     | 435 (99.8)  | 1 (0.2)     |
|                                          | University graduate | 897 (98.9%) | 10 (1.1) p*  | 901 (99.3)  | 6 (0.7) NS  | 863 (95.1)  | 44 (4.9) NS  | 899 (99.1)  | 8 (0.9) NS  | 899 (99.1)  | 8 (0.9) NS  |
| Father's level of education              | No education        | 131 (99.2)  | 1 (0.8)      | 132 (100.0) | 0 (0.0)     | 129 (97.7)  | 3 (2.3)      | 131 (99.2)  | 1 (0.8)     | 132 (100.0) | 0 (0.0)     |
|                                          | Primary             | 586 (99.0)  | 6 (1.0)      | 587 (99.2)  | 5 (0.8)     | 558 (94.3)  | 34 (5.7)     | 585 (99.2)  | 5 (0.8)     | 587 (99.2)  | 5 (0.8)     |
|                                          | Complementary       | 941 (98.5)  | 14 (1.5)     | 950 (99.5)  | 5 (0.5)     | 912 (95.5)  | 43 (4.5)     | 949 (99.4)  | 6 (0.6)     | 951 (99.6)  | 4 (0.4)     |
|                                          | Secondary           | 694 (98.7)  | 9 (1.3)      | 699 (99.4)  | 4 (0.6)     | 667 (94.9)  | 36 (5.1)     | 698 (99.3)  | 5 (0.7)     | 699 (99.4)  | 4 (0.6)     |
|                                          | Undergraduate       | 275 (97.2)  | 8 (2.8)      | 278 (98.2)  | 5 (1.8)     | 269 (95.1)  | 14 (4.9)     | 281 (99.3)  | 2 (0.7)     | 281 (99.3)  | 2 (0.7)     |
|                                          | University graduate | 452 (99.8)  | 1 (0.2) NS   | 448 (98.9)  | 5 (1.1) NS  | 428 (94.5)  | 25 (5.5) NS  | 446 (98.5)  | 7 (1.5) NS  | 451 (99.6)  | 2 (0.4) NS  |
| Other factors                            |                     |             |              |             |             |             |              |             |             |             |             |
| Medical history                          | No                  | 1673 (98.6) | 23 (1.4)     | 1683 (99.2) | 13 (0.8)    | 1601 (94.4) | 95 (5.6)     | 1680 (99.2) | 14 (0.8)    | 1679 (99.0) | 17 (1.0)    |
|                                          | Yes                 | 1665 (98.9) | 19 (1.1) NS  | 1672 (99.3) | 12 (0.7) NS | 1621 (96.3) | 63 (3.7) p*  | 1668 (99.2) | 13 (0.8) NS | 1674 (99.4) | 10 (0.6) NS |
| Ongoing treatment                        | No                  | 2802 (98.5) | 42 (1.5)     | 2823 (99.3) | 21 (0.7)    | 2724 (95.8) | 120 (4.2)    | 2819 (99.4) | 18 (0.6)    | 2824 (99.3) | 20 (0.7)    |
|                                          | Yes                 | 479 (98.4)  | 8 (1.6) NS   | 480 (98.6)  | 7 (1.4) NS  | 463 (95.1)  | 24 (4.9) NS  | 483 (99.2)  | 4 (0.8) NS  | 484 (99.4)  | 3 (0.6) NS  |
| Child visit to the pediatrician/doctor   | No                  | 667 (98.2)  | 12 (1.8)     | 676 (99.6)  | 3 (0.4)     | 645 (95.0)  | 34 (5.0)     | 672 (99.4)  | 4 (0.6)     | 674 (99.3)  | 5 (0.7)     |
|                                          | Yes                 | 2580 (98.5) | 38 (1.5) NS  | 2593 (99.0) | 25 (1.0) NS | 2508 (95.8) | 110 (4.2) NS | 2596 (99.3) | 18 (0.7) NS | 2600 (99.3) | 18 (0.7) NS |
| Previous child visit to the psychologist | No                  | 3155 (98.7) | 41 (1.3)     | 3170 (99.2) | 26 (0.8)    | 3042 (95.2) | 154 (4.8)    | 3169 (99.3) | 23 (0.7)    | 3179 (99.5) | 17 (0.5)    |
|                                          | Yes                 | 143 (100.0) | 0 (0.0) NS   | 143 (100.0) | 0 (0.0) NS  | 134 (93.7)  | 9 (6.3) NS   | 140 (97.9)  | 3 (2.1) NS  | 140 (97.9)  | 3 (2.1%) p* |

p\* = p &lt; 0.05

NS = Non-significant p value &gt; 0.05
